# Supplementary material for: Water Is an Active Element: A Randomized Double-Blind Controlled Clinical Trial Comparing Cutaneous Lipidomics in Consumers Drinking Two Different Bicarbonate-Calcic Waters (Medium-Mineral vs. Oligo-Mineral)
Source: MDPI journal article supplement (doi:10.3390/biomedicines11041036), 2023-03-27
Supplement: s1 [file s1]

## Supplementary S1

“Water A<sup>1</sup>” still medium-mineral water: official analysis and information

*Aspect and characteristics:* clear, colorless, taste-free and odorless

### Chemical analysis:

Total dry solids at 180° C (mg/l): 181,6

Electrical conductivity at 20° C (μs/cm): 297,6

pH: 7,61

Carbon dioxide free at source (mg/L): 7,33

### Dissolved substances expressed in ions (mg/L):

Calcium Ca<sup>++</sup>: 60,36

Sodium Na<sup>+</sup>: 3,87

Magnesium Mg<sup>++</sup>: 3,73

Potassium K<sup>+</sup>: 0,35

Stronzium Sr<sup>++</sup>: 0,13

Bicarbonates HCO<sub>3</sub><sup>-</sup>: 185,4

Sulphates SO<sub>4</sub><sup>-</sup>: 7,54

Chlorides Cl<sup>-</sup>: 7,34

Nitrates NO<sub>3</sub><sup>-</sup>: 1,38

Fluorides F<sup>-</sup>: 0,14

Silica SiO<sub>2</sub>: 5,19

*Microbiologically pure*

---

<sup>1</sup> “Water A” is marketed under the name of “Rocchetta naturale”

Analysis performed by the Università degli Studi di Camerino, 7 June 2018. Authorised by Health Ministry decree D.D. N° 3294-191, dated 24 January 2000. Authorised by DDGR Umbria n° 7819, dated 22 September 2004. 1,500 QUALITY CONTROLS DAILY - QUALITY CONTROL SYSTEM UNI EN ISO 9001-15 CSQA n° 023

“Water B<sup>2</sup>” still oligo-mineral water: official analysis and information

*Aspect and characteristics:* clear, colorless, naturally effervescent and calcium bicarbonate

Chemical analysis:

Dry residue at 180° C (mg/L): 741

Electrical conductivity at 20° C (µs/cm): 1099

pH: 5,8

Dissolved substances expressed in ions (mg/L):

Calcium Ca<sup>++</sup>: 175

Sodium Na<sup>+</sup>: 64

Magnesium Mg<sup>++</sup>: 26

Potassium K<sup>+</sup>: 7,2

Bicarbonates HCO<sub>3</sub><sup>-</sup>: 578

Sulphates SO<sub>4</sub><sup>-</sup>: 92

Chlorides Cl<sup>-</sup>: 74

Nitrates NO<sub>3</sub><sup>-</sup>: 6,5

Fluorides F<sup>-</sup>: 1,0

Silica SiO<sub>2</sub>: 8,8

Lithium: 0,16

Antimony: <0.0002 mg/L

Cyanide: <0.0010 mg/L

Microbiologically pure

---

<sup>2</sup> “Water B” is a general oligo-mineral water decided as comparator
